# Supplementary material for: Comparative Transcriptome Analysis Reveals Complex Physiological Response and Gene Regulation in Peanut Roots and Leaves under Manganese Toxicity Stress
Source: MDPI journal article supplement (doi:10.3390/ijms24021161), 2023-01-06
Supplement: s1 [file s1]

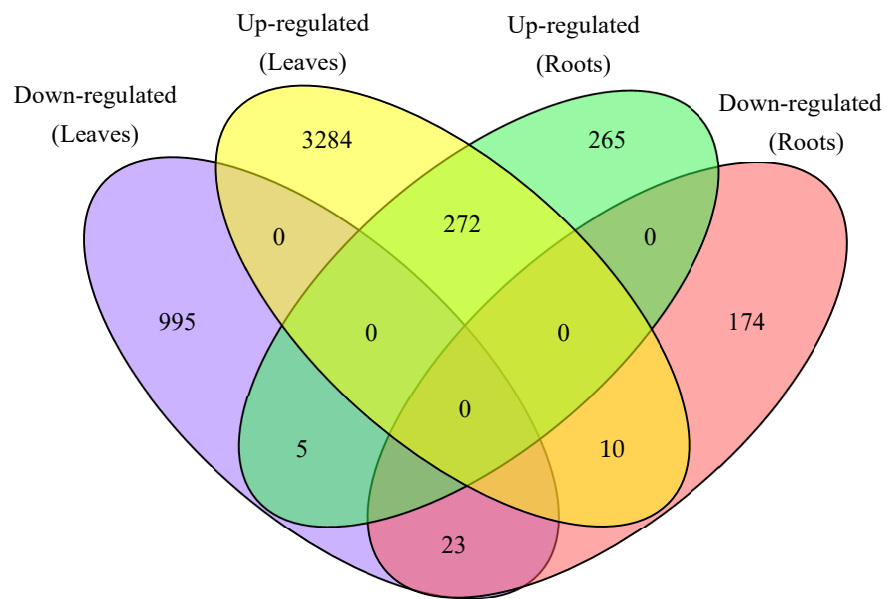

**Figure S1.** Analysis using a Venn diagram of the genes that differ in expression between Mn toxicity and control treatments in the peanut leaves and roots.

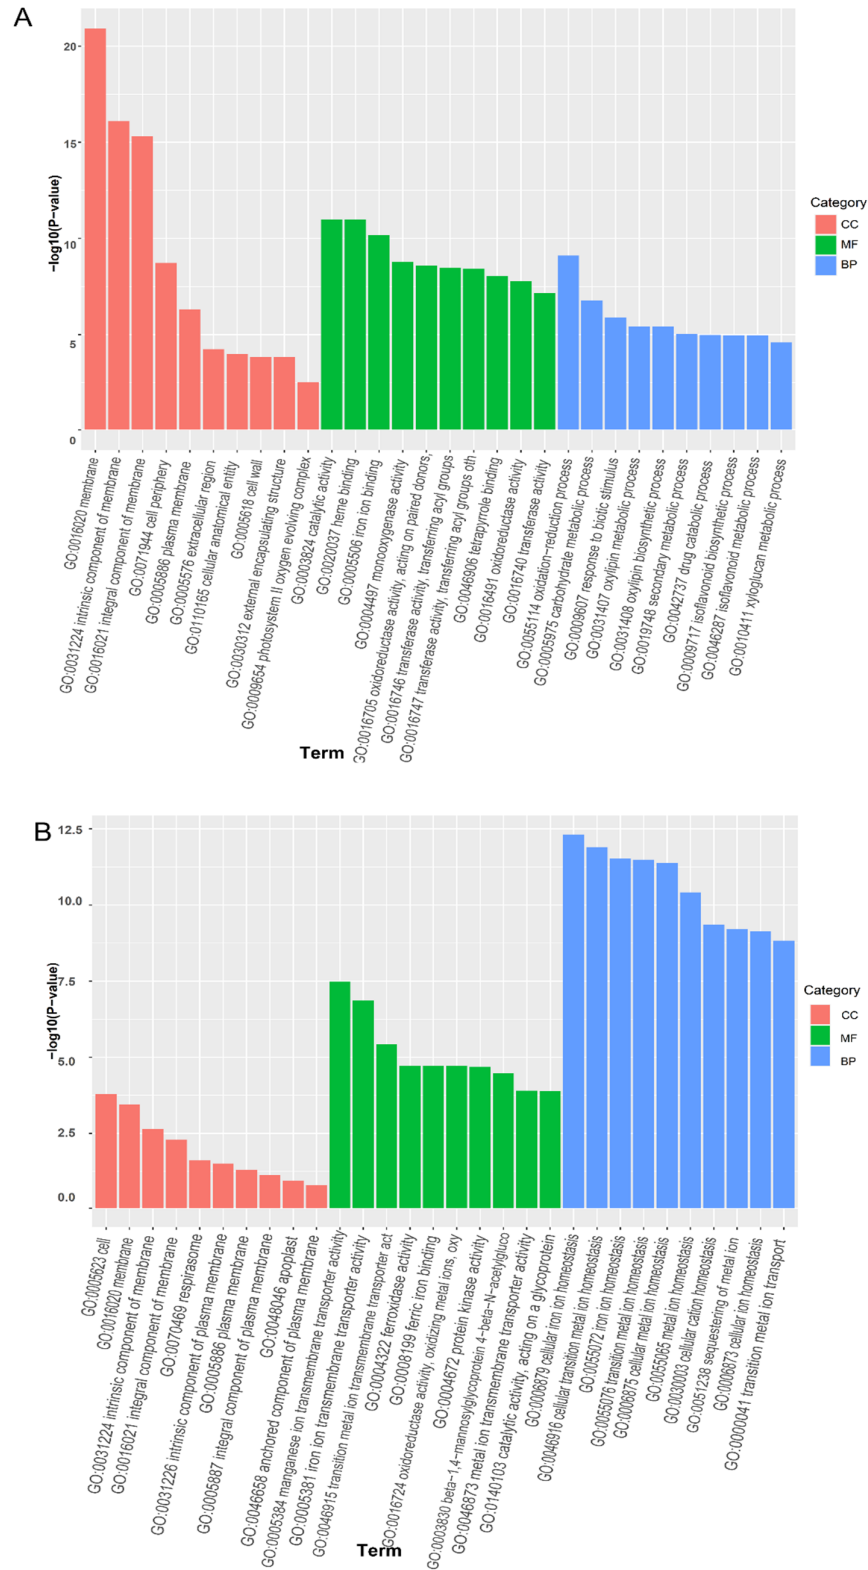

**Figure S2.** Histogram of GO enrichment analysis. A: CK leaves and 300  $\mu\text{M}$  Mn leaves, B: CK roots and 300  $\mu\text{M}$  Mn roots. The horizontal coordinate was the term of Go level2 level and the vertical coordinate was the  $-\log_{10}$  (p-value) of enrichment for each term.
